# Supplementary material for: Endogenous opioids contribute to insensitivity to pain in humans and mice lacking sodium channel Nav1.7
Source: PubMed Central journal article supplement (PMC4686868; doi:10.1038/ncomms9967), 2015-12-04
Supplement: ncomms9967-s1.pdf [file ncomms9967-s1.pdf]

**Supplementary Table 1 Genes mis-expressed in both Nav1.7 and Nav1.8 null mutant DRG**

| Gene            | Fold-change Nav1.7 | Fold-change Nav1.8 |
|-----------------|--------------------|--------------------|
| <i>Ceacam10</i> | - 18.94            | - 2.63             |
| <i>Smr2</i>     | +1.96              | -1.78              |
| <i>Lrrc31</i>   | -4.37              | -1.66              |

Three transcripts are common to the altered transcriptome in Nav1.7 and Nav1.8 null mutant dorsal root ganglia, although *Smr2* is upregulated in the absence of Nav1.7 but downregulated in the absence of Nav1.8.

**Supplementary Table 2 Genes mis-expressed in both Nav1.7 and Nav1.9 null mutant DRG**

| Gene          | Fold change Nav1.7 | fold change Nav1.9 |
|---------------|--------------------|--------------------|
| <i>Ptger1</i> | +2.68              | -1.92              |
| <i>Sox11</i>  | +1.57              | -1.63              |
| <i>Lrat</i>   | -1.57              | -1.71              |
| <i>Npy1r</i>  | -1.8               | -1.68              |
| <i>Jun</i>    | +1.94              | -1.52              |
| <i>Mbp</i>    | -1.52              | +1.52              |
| <i>Msi2</i>   | -1.52              | +1.6               |

Several genes are dysregulated in both Nav1.7 and Nav1.9 null mutant mouse DRG , but only 2 (*Npy1r* and *Lrat*) are jointly downregulated.
